## 14 **Abstract**

15 Mutations in the *PINK1* and *PRKN* genes are the most common cause of early-onset familial  
16 Parkinson disease. These genes code for the PINK1 and Parkin proteins, respectively, which are  
17 involved in the degradation of dysfunctional mitochondria through mitophagy. An early step in  
18 PINK1 – Parkin mediated mitophagy is the ubiquitination of the mitofusin proteins MFN1 and -2. The  
19 ubiquitination of MFN1 and -2 in patient samples may therefore serve as a biomarker to determine  
20 the functional effects of *PINK1* and *PRKN* mutations, and to screen idiopathic patients for potential  
21 mitophagy defects. We aimed to characterise the expression of the PINK1 – Parkin mitophagy  
22 machinery in peripheral blood mononuclear cells (PBMCs) and assess if these cells could serve as a  
23 platform to evaluate mitophagy via analysis of MFN1 and -2 ubiquitination. Mitophagy was induced  
24 through mitochondrial depolarisation by treatment with the protonophore CCCP and ubiquitinated  
25 MFN proteins were analysed by western blotting. In addition, *PINK1* and *PRKN* mRNA and protein  
26 expression levels were characterised with reverse transcriptase quantitative PCR and western  
27 blotting, respectively. Whilst CCCP treatment led to MFN ubiquitination in primary fibroblasts, SH-  
28 SY5Y neuroblastoma cells and Jurkat leukaemic cells, treatment of PBMCs did not induce  
29 ubiquitination of MFN. *PRKN* mRNA and protein was readily detectable in PBMCs at comparable  
30 levels to those observed in Jurkat and fibroblast cells. In contrast, PINK1 protein was undetectable  
31 and *PINK1* mRNA levels remarkably low in control PBMCs. Our findings suggest that the PINK1 –  
32 Parkin mitophagy signalling pathway is not functional in PBMCs. Therefore, PBMCs are not a suitable  
33 biosample for analysis of mitophagy function in Parkinson disease patients.

34

## 35 Introduction

36            Parkinson disease (PD) has a heterogeneous clinical presentation. An important goal in PD  
37 research is to identify if and how this heterogeneity is related to biochemical and cell biological  
38 differences, which inform the pathophysiology of the disease [1]. The identification of such  
39 differences is important for three interrelated reasons: (1) the elucidation of mechanistic targets for  
40 drug development, (2) the selection of the most appropriate patient cohorts for clinical trials, and (3)  
41 to provide functional readouts allowing the identification of target engagement and changes in  
42 cellular and biochemical phenotypes.

43            Although most cases of PD are idiopathic, there are some rare early-onset familial forms,  
44 which may provide insights into potential biochemical subtypes that exist within the wider,  
45 idiopathic PD population. The most common forms of early-onset familial PD are caused mutations  
46 in the *PINK1* and *PRKN* genes, which encode PTEN induced putative kinase 1 (PINK1) [2] and Parkin,  
47 respectively [3]. Both proteins act in the same quality control pathway to sense damaged  
48 mitochondria and target them for degradation through a specialised form of macro-autophagy, also  
49 known as mitophagy. PINK1 is a mitochondrial kinase imported into the mitochondria via the  
50 preprotein translocase complexes where it is constitutively degraded by the presenilin-associated  
51 rhomboid-like protein (PARL) [4]. Loss of mitochondrial membrane potential disrupts the  
52 mitochondrial import and degradation of PINK1, which subsequently accumulates on the outer  
53 mitochondrial membrane (OMM) [5]. Here, PINK1 undergoes autophosphorylation [6] and  
54 phosphorylates Parkin at serine 65, promoting its mitochondrial translocation and stabilisation [7].  
55 Phosphorylation of ubiquitin at serine 65 by PINK1 further promotes the full activation of Parkin [8,  
56 9]. Parkin, an E3 ubiquitin ligase ubiquitinates multiple OMM proteins, including mitofusin 1 (MFN1)  
57 and mitofusin 2 (MFN2) [10]. Recruitment of autophagy adaptors by ubiquitin chains conjugated to  
58 OMM proteins [11] leads to the engulfment of impaired mitochondria by autophagosomes, which  
59 fuse with lysosomes causing the eventual degradation of defective mitochondria.

60            The clinical, molecular and functional genetics of *PINK1* and *PRKN* are complex. Disease  
61 causing mutations can include missense mutations, deletions and copy number variations, which can  
62 be inherited in homozygous and compound heterozygous patterns [2, 3, 12, 13]. Pathogenic *PINK1*  
63 and *PRKN* mutations are generally associated with a loss of function of the respective proteins.  
64 Furthermore, recent findings demonstrate that heterozygously inherited *PINK1* mutations can confer  
65 increased PD risk, an effect that may be mediated at the molecular level by a dominant negative  
66 mechanism during PINK1 dimerisation [14, 15]. However, the effects of these mutations on Parkin  
67 and PINK1 function, and on downstream mitophagy, have not been fully characterised. For instance,  
68 there are over 200 *PRKN* variants, some of which are pathological and which have differing effects

69 on Parkin function and mitophagy [16]. Moreover, mitophagy is impaired in skin fibroblasts from PD  
70 patients with no known genetic cause [17, 18]. These findings suggest that defects in mitophagy may  
71 contribute to idiopathic PD in some patients [19].

72 Although the role of mitophagy in the pathogenesis of PD is debated, functional readouts of  
73 the PINK1 – Parkin mitophagy signalling pathway may provide patient stratification, even if they are  
74 epiphenomenal to disease causing processes. Such readouts will also allow the functional  
75 characterisation of novel *PINK1* and *PRKN* variants and those of unknown significance. One such  
76 functional readout is the ubiquitination of the MFN proteins following mitochondrial depolarisation,  
77 a lack of which distinguishes *PINK1* and *PRKN* mutant fibroblasts from those isolated from healthy  
78 controls [20]. In this study we aimed to translate this readout to peripheral blood mononuclear cells  
79 (PBMCs), which represent a minimally invasive source of biological tissue for biomarker analysis. We  
80 have also characterised the expression of the PINK1 – Parkin signalling pathway in different cell  
81 types and demonstrate that the pathway is not functional in PBMCs. This work thus adds an  
82 important contribution to knowledge on the mitochondrial biology of PBMCs and their utility in PD  
83 research.

84

## 85 **Results**

### 86 **Treatment of fibroblasts with CCCP induces MFN ubiquitination in a** 87 **PINK/Parkin dependent manner**

88 We began by characterising the effect of mitochondrial depolarisation upon the  
89 ubiquitination of the OMM proteins MFN1 and MFN2 in primary fibroblast cultures. Fibroblasts from  
90 2 healthy controls were treated with 20  $\mu$ M carbonyl cyanide *m*-chlorophenyl hydrazone (CCCP) for  
91 2 hours to depolarise the mitochondria followed by western blot analysis. In untreated cells, MFN1  
92 was detected as a double band, with the lower and upper bands migrating at 75 and 78 kDa,  
93 respectively, and MFN2 was detected as a single band with an apparent  $M_r$  of 75 kDa (Fig 1). CCCP  
94 treatment led to the appearance of an extra anti-MFN1 reactive band, which migrated with an  
95 apparent  $M_r$  that was 9 kDa larger than the lower MFN1 band detected in untreated cells. In  
96 addition, an extra anti-MFN1 reactive band that was 9 kDa larger than the MFN2 band in untreated  
97 cells was detected (Fig 1). This size change is consistent with mono-ubiquitination and our previous  
98 work [10] indicates that the extra MFN1 and MFN2 bands detected post-CCCP treatment are  
99 ubiquitin positive. Next, we performed the same treatment and analysis on fibroblast cultures from  
100 two early-onset PD patients, one with a homozygous nonsense mutation in *PINK1* and one with a  
101 homozygous deletion in *PRKN*. Consistent with previous reports [20], CCCP treatment failed to

102 induce ubiquitination of either MFN1 or MFN2 in fibroblasts from either patient (Fig 1). These results  
103 demonstrate that CCCP-induced ubiquitination of MFN1 and MFN2 in fibroblasts depends upon the  
104 presence of functional PINK1 and Parkin proteins.

105

## 106 **Treatment of Jurkat cells with CCCP induces MFN ubiquitination**

107 We next asked whether CCCP-induced MFN ubiquitination was a shared feature across  
108 different cell types. We first opted to analyse the immortalised T-lymphocyte cell line Jurkat as a  
109 surrogate model for primary leucocyte cells. Similar to that observed in control fibroblasts, CCCP  
110 treatment produced extra anti-MFN1 and anti-MFN2-2 reactive bands, whose migration was  
111 consistent with mono-ubiquitination of the respective proteins (Fig 2A). In addition, we observed  
112 faint anti-MFN1 and anti-MFN2-2 reactive bands suggestive for polyubiquitination. Time course  
113 analysis demonstrated that CCCP-induced ubiquitination of MFN1 and MFN2 occurred as early as 30  
114 minutes post-treatment and persisted up to 24 hours post-treatment (Fig 2B). The maximum  
115 ubiquitinated MFN signal was detected at 2 hours post-treatment, for both MFN1 and MFN2 (S1  
116 Fig). Thus, Jurkat cells respond in the same way as fibroblasts to CCCP treatment in terms of MFN  
117 ubiquitination.

118

## 119 **Treatment of PBMCs from healthy controls with CCCP does not** 120 **induce MFN ubiquitination**

121 Following these findings, we aimed to compare the CCCP-induced MFN ubiquitination  
122 response across 4 different cell types: the immortalised neuroblastoma SH-SY5Y cell line, the  
123 immortalised Jurkat T-lymphocyte cell line, primary cultured fibroblasts and PBMCs derived from  
124 healthy controls. Similarly to the results obtained with fibroblasts and Jurkat cells, and consistent  
125 with our previous report [10], treatment of SH-SY5Y cells with CCCP produced an anti-MFN1 and  
126 anti-MFN2 reactive profile consistent with ubiquitination (Fig 3). As demonstrated in Figs 1 and 2,  
127 anti-MFN1 and anti-MFN2 reactive bands consistent with mono-ubiquitination were also detected in  
128 CCCP-treated Jurkat cells and fibroblasts; however, we did not detect anti-MFN1 and anti-MFN2  
129 reactive bands consistent with MFN ubiquitination in CCCP-treated PBMC samples (Fig 3). Long  
130 exposure images also did not reveal any signal consistent with ubiquitination of either MFN1 or -2.  
131 These results demonstrate that under the conditions tested, CCCP treatment does not induce  
132 ubiquitination of MFN1 or -2 in PBMCs.

133

## 134 **Parkin is expressed in PBMCs from healthy controls**

135 In order to shed light on lack of CCCP-induced MFN ubiquitination in PBMCs, we next  
136 determined the relative expression of PINK1 and Parkin. We began by assessing the relative  
137 abundance of *PRKN* transcripts in Jurkat, fibroblast, SH-SY5Y and PBMC samples. RNA was isolated  
138 from the cells and reverse transcribed to create cDNA libraries from which *PRKN* transcripts were  
139 amplified by real-time quantitative PCR (qPCR). *PRKN* mRNA was readily amplified from all cell types,  
140 and when normalised, fibroblasts (2 independent cultures) and SH-SY5Y cells exhibited 11.8, 10.2  
141 and 12.6 times the *PRKN* levels detected in Jurkat cells (Fig 4A). *PRKN* transcripts were also amplified  
142 from 5 independent control PBMC cultures. Levels in these cultures were similar to those detected  
143 in Jurkat cells (Fig 4A).

144 By western blot analysis, Parkin protein was readily detected in 3 independent control  
145 fibroblast cultures as well as in Jurkat cells and SH-SY5Y cells as a single band migrating at ~48 kDa  
146 (Fig 4B). SH-SY5Y cells demonstrated the highest Parkin signal (~23 fold more than Jurkat and  
147 fibroblast cells, Fig 4D). A ~48-kDa band was also detected in PBMC samples from 6 healthy controls  
148 (Fig 4C). This protein co-migrated with that detected in SH-SY5Y cells and Jurkat cells, and  
149 importantly, was absent from HeLa cells, which have been demonstrated to not express Parkin  
150 protein [21]. Therefore, we assume that the ~48-kDa band detected in PBMCs represents Parkin.  
151 Quantitatively, the Parkin signal from PBMCs was not significantly different from that detected in  
152 either Jurkat or fibroblast cells (Fig 4D). Collectively, these findings demonstrate that Parkin is  
153 expressed in PBMCs and, consequently, that the lack of CCCP-induced MFN ubiquitination in these  
154 cells is not due to a lack of Parkin expression.

155

## 156 **PINK1 is undetectable in PBMCs from healthy controls**

157 In order to investigate the expression levels of *PINK1* mRNA in PBMCs, RNA was isolated  
158 from Jurkat, fibroblast, SH-SY5Y and PBMC samples and followed by reverse transcriptase qPCR.  
159 *PINK1* transcript levels in fibroblasts exceeded those detected in Jurkat cells by 33.8 and 32.7 times  
160 (for two independent control cultures), whilst levels in SH-SY5Y cells were similar to those in Jurkat  
161 cells (Fig 5A). Levels of *PINK1* mRNA in PBMCs from healthy controls were 20–100 times lower than  
162 those detected in Jurkat cells and >3000 times lower than those detected in fibroblast cultures (Fig  
163 5A).

164 *PINK1* protein is constitutively degraded by PARL in the mitochondria and, as a result,  
165 undetectable under basal conditions. In order to detect *PINK1*, the mitochondrial membrane  
166 potential must be dissipated, for example with prolonged CCCP treatment. Therefore, control  
167 fibroblasts, SH-SY5Y cells, Jurkat cells and PBMCs were treated with 20  $\mu$ M CCCP for 24 hours,  
168 followed by western blot analysis for *PINK1*. *PINK1* antibodies have been reported to give a panoply

169 of non-specific bands when used in western blotting, including at the predicted  $M_r$  of PINK1, as  
170 determined in knockout cells [22]. Such observations may confound the interpretation of results and  
171 render the use of biological controls as critical when studying PINK1 protein. Indeed, even in  
172 untreated cells we detected numerous cross reactive bands in fibroblast, SH-SY5Y and Jurkat  
173 samples with a PINK1 antibody from Novus Biologicals (Fig 5B). However, when these cells were  
174 treated with CCCP, an additional band appeared at ~60 kDa, the predicted molecular weight of  
175 mature PINK1 (Fig 5B). This band was absent in untreated cells and is, thus, consistent with PINK1.  
176 The levels of PINK1 protein were significantly higher in Jurkat cells than either fibroblast or SH-SY5Y  
177 cells. Fibroblast cells expressed the lowest levels of PINK1 after CCCP treatment, 10 times lower than  
178 detected in Jurkat cells (Fig 5C). However, in PBMCs the pattern of PINK1 cross reactive proteins was  
179 unchanged between treated and untreated cells (Fig 5B). Specifically we did not detect an additional  
180 band at 60 kDa when cells were treated with CCCP, thus suggesting that PINK1 protein is not  
181 detectable in PBMCs. With an alternative PINK1 antibody from Cell Signaling Technologies, we also  
182 failed to detect PINK1 in CCCP-treated PBMCs, despite adequate detection in the other cell types (S2  
183 Fig). The lack of PINK1 detection in PBMCs may explain the absence of CCCP-induced MFN  
184 ubiquitination in these cells.

185 During mitophagy, mitochondrial proteins are degraded in the lysosome. Accordingly,  
186 mitophagy can be monitored by assessing the levels of mitochondrial proteins post mitophagic  
187 induction. Indeed, in Jurkat, fibroblast and SH-SY5Y cells, 24 hour CCCP treatment led to significant  
188 reductions in subunit A of the mitochondrial succinate dehydrogenase complex (SDHA) (Fig 5D). In  
189 PBMCs, conversely, treatment with CCCP did not significantly affect SDHA levels (Fig 5D). These  
190 findings suggest differences in CCCP-induced mitophagy between cultured SH-SY5Y, fibroblast and  
191 Jurkat cells on the one hand, and PBMCs on the other.

192

## 193 **The PINK1– Parkin mitophagy signalling pathway is not expressed** 194 **in activated T cells and lymphoblastoid cell lines**

195 PBMCs cultured under normal conditions are non-proliferative, whereas Jurkat cells are  
196 robustly proliferating T lymphocyte-like cells. For that reason, we investigated whether inducing the  
197 proliferation of T cells in the PBMC samples would shift their response to CCCP treatment.  
198 Moreover, we analysed how Epstein-Barr virus (EBV) immortalised lymphoblastoid cell lines (LCLs)  
199 from healthy controls responded to CCCP treatment. The T-cell fraction of PBMCs were induced to  
200 proliferate by incubation with T-activator CD3/CD28 Dynabeads. This treatment led to the  
201 appearance of cell clusters, which were visually similar to cell clusters observed in both Jurkat and  
202 LCL cultures (Fig 6A). Despite these morphological similarities, neither activated PBMCs nor LCLs

203 responded to 2-hour CCCP treatment with ubiquitination of MFN1 or MFN2 (Fig 6B). Furthermore,  
204 PINK1 protein did not accumulate in either cell type following prolonged CCCP treatment (Fig 6C).  
205 *PINK1* mRNA levels in LCLs were also 10–25 times lower than those detected in fibroblasts (S3 Fig).  
206 As shown in Fig 4, western blot analysis detected Parkin in Jurkat cells and non-proliferating PBMCs;  
207 however, Parkin was undetectable in PBMCs activated with CD23/CD8 Dynabeads and in 4  
208 independent LCLs (Fig 6D). Collectively, these findings demonstrate that whilst Jurkat cells exhibit  
209 CCCP-induced PINK1 – Parkin signalling, this pathway is absent from activated PBMCs and LCLs.  
210

## 211 Discussion

212 In this study we aimed to assess the utility of PBMCs as a platform for studying mitophagy  
213 defects in PD patients. Our analysis demonstrated that PBMCs are unsuitable for this purpose as  
214 they do not functionally express the PINK1 – Parkin mitophagy signalling pathway. The  
215 ubiquitination of MFN proteins following CCCP treatment can be used as a marker of early  
216 mitophagy in fibroblasts, and distinguishes control fibroblasts from those with *PINK1* or *PRKN*  
217 mutations [20]. Our findings demonstrate that this process is not conserved in all cell types.  
218 Specifically, PBMCs and lymphocytes immortalised by EBV transduction lack the necessary  
219 machinery to transduce loss of mitochondrial membrane potential into MFN ubiquitination.

220 In agreement with previous work, we detected *PRKN* mRNA and Parkin protein in PBMCs  
221 from healthy controls [23, 24]. Parkin is a multi-functional protein with roles in diverse cellular  
222 processes, including those related to immunity [25]. Its expression in these cells is thus expected.  
223 However, we were unable to detect PINK1 protein in PBMCs, and levels of *PINK1* mRNA in these cells  
224 were remarkably low, up to 3000 times lower than those detected in fibroblast cells. The low levels  
225 of PINK1 expression in PBMCs likely explains their lack of CCCP-induced MFN ubiquitination, as  
226 PINK1 accumulation is required to activate Parkin on the mitochondrial surface [8]. PINK1 protein  
227 was also undetectable in LCLs and mRNA levels were 10–25 times lower than those detected in  
228 fibroblasts.

229 Jurkat cells underwent CCCP-induced MFN ubiquitination and time dependent reduction in  
230 SDHA levels, indicating functional mitophagy similar to that observed in fibroblasts and SH-SY5Y  
231 cells. Moreover, Jurkat cells expressed readily detectable levels of *PINK1* and *PRKN* mRNA and the  
232 respective proteins. Jurkat cells are an EBV-negative T-cell line derived from an acute lymphoblastic  
233 leukaemia biopsy, and proliferate rapidly in culture [26, 27]. We thus considered that it may have  
234 been the quiescence of primary PBMCs, which rendered them insensitive to CCCP-induced  
235 mitophagy. However, stimulation of PBMCs with CD3/CD28 antibodies, whilst leading to robust  
236 proliferation [28], did not result in CCCP-induced MFN ubiquitination. In fact, stimulated PBMCs



237 massively downregulated Parkin expression. PBMCs isolated from patients are a heterogeneous  
238 cellular sample [29], and this reduction in Parkin expression post-stimulation may have been due to  
239 the clonal expansion of PBMC sub-populations lacking Parkin expression. In favour of this  
240 hypothesis, we noted that EBV-transformed lymphocytes from four independent controls did not  
241 express Parkin protein at detectable levels. It is tempting to speculate that the lack of Parkin in these  
242 immunoactive cells may reflect a specific function. For instance, the downregulation of Parkin in  
243 blood cells may promote viral clearance through promoting mitochondrial ROS production [30].

## 244 **Conclusions**

245 Overall, our findings demonstrate PBMCs from control subjects do not undergo MFN  
246 ubiquitination after acute induction of mitophagy with CCCP. PBMCs express extraordinarily low  
247 *PINK1* mRNA levels and PINK1 protein is undetectable. The physiology of these cells thus precludes  
248 their use as a platform in studying the PINK1 – Parkin mitophagy signalling pathway in PD research.

249

## 250 **Methods**

### 251 **Attainment of samples**

252 Primary human dermal fibroblast cultures were established from skin explants of two early-  
253 onset PD patients, one female patient with a homozygous p.R246X nonsense mutation in *PINK1* and  
254 a heterozygous deletion of exons 4–6 in *PRKN*, and one female patient with a homozygous deletion  
255 of exons 4–5 in *PRKN*. In addition, skin biopsies were obtained from age-matched healthy control  
256 subjects. Fibroblast cultures were established according to standard procedures [31]. Ethical  
257 approval for this work was obtained from the Royal Free Hospital and Medical School Research  
258 Ethics Committee (REC 07/H0720/161). Ethical approval for PBMC work was obtained from Camden  
259 and King's Cross Research Ethics Committee (REC 17/LO/1166). All donors provided prior informed  
260 written consent and all work was performed in compliance with national legislation and the  
261 Declaration of Helsinki.

262

### 263 **PBMC isolation, culture and treatment**

264 PBMCs were isolated using standard Ficoll gradient separation protocols. Blood collected in  
265 EDTA-coated vacutainer blood tubes was mixed with an equal volume of phosphate-buffered saline  
266 (PBS). Diluted blood (20 ml) was layered on to 15 ml of Lymphoprep (Stemcell Technologies) in 50-ml  
267 Falcon tubes and centrifuged at 400× *g* for 30 min without deceleration. The resultant PBMC layer  
268 was then aspirated into a new 15-ml Falcon tube and washed twice in PBS, centrifuging at 300× *g* to

269 reduce platelet contamination. Fresh PBMCs were then re-suspended in RPMI medium (Thermo  
270 Fisher Scientific, 61870) and counted using a flow cytometer (Moxi GO™, Orflo Technologies).

271 For routine analysis, PBMCs were cultured at  $1 \times 10^6$  cells/ml in RPMI supplemented with 10%  
272 foetal bovine serum (FBS) and 1 mM sodium pyruvate at 37°C, 5% CO<sub>2</sub>. After 24 h, cells were treated  
273 with 20 μM CCCP and harvested at the indicated time points. For harvesting, 2 volumes of PBS were  
274 directly added to the suspended cells, followed by centrifugation at 500× *g* for 10 min. The pellet  
275 was resuspended in 1 ml of PBS and centrifuged at 17,000× *g* for 10 min at 4°C. The supernatant was  
276 aspirated and the pellet was stored at -80°C until further analysis. The age and sex of the donors of  
277 the PBMC samples used in this study are shown in S4 Table.

278

## 279 **Culturing of fibroblasts, SH-SY5Y, Jurkat and LCLs**

280 Primary human skin fibroblast cultures were grown in DMEM (Thermo Fisher Scientific,  
281 61965-059) supplemented with 10% FBS, 1 mM sodium pyruvate, and 50 units/ml of penicillin and  
282 50 μg/ml of streptomycin at 37°C, 5% CO<sub>2</sub>. SH-SY5Y cells were cultured in DMEM: F12 (1:1) (Thermo  
283 Fisher Scientific, 31331-028) supplemented with 10% FBS, 1× non-essential amino acids and  
284 penicillin/streptomycin at 37°C, 5% CO<sub>2</sub>. When confluent, cultures were passaged using  
285 trypsinisation. Jurkat cells and LCLs were cultured in suspension in RPMI medium 1640 (Thermo  
286 Fisher Scientific, 61870-127) supplemented with 10% FBS and 1 mM sodium pyruvate at 37°C, 5%  
287 CO<sub>2</sub>. Cells were maintained at  $5 \times 10^5$ – $3 \times 10^6$  cells/ml.

288

## 289 **PBMC activation with CD3/CD28 Dynabeads**

290 PBMCs were incubated with Dynabeads Human T-Activator CD3/CD28 (Thermo Fisher  
291 Scientific, 11132D) at a ratio of 1 : 1 and cultured in OpTmizer T-cell expansion SFM medium  
292 supplemented with 10 mM L-glutamine, penicillin/streptomycin, serum substitute (Thermo Fisher  
293 Scientific, A1048501) and 30 U/ml of interleukin-2 (IL-2; Thermo Fisher Scientific, PHC0026) at 37°C,  
294 5% CO<sub>2</sub>. Cultures were maintained at  $1 \times 10^6$ – $3 \times 10^6$  cells/ml. Cells were activated for 7 days prior to  
295 analysis.

296

## 297 **Reverse-transcriptase real-time quantitative PCR**

298 RNA was isolated from cell pellets with the RNeasy kit (Qiagen, 74104) and quantified with a  
299 Nanodrop spectrophotometer (Thermo Fisher Scientific). RNA (500 ng) was reverse transcribed to  
300 produce cDNA libraries using the QuantiTect Reverse Transcriptase Kit from Qiagen (205311). cDNA  
301 was quantified by Qubit analysis with the 1× dsDNA HS Assay Kit (Thermo Fisher Scientific, Q33230).

302 For qPCR, 1 ng of cDNA was mixed with forward and reverse primers (final concentration 10  $\mu$ M),  
303 PowerUp SYBR Green Master Mix (Thermo Fisher Scientific, A25780) and water to a final volume of  
304 20  $\mu$ l. Primers were purchased from Qiagen (*PRKN*: QT00023401; *PINK1*: QT00056630).

305 Following initial denaturation at 50°C for 2 min and activation at 95°C for 2 min,  
306 thermocycling was performed with 50 cycles of denaturation (94°C, 15 sec), annealing (55°C, 30 sec)  
307 and extension (72°C, 30 sec), using an Applied Biosystems StepOne real-time PCR system. Samples  
308 were analysed as technical triplicates. Fluorescence was read during the extension step. Melting  
309 temperature analysis was performed on the amplified products to ensure consistency within and  
310 between runs. Amplicon specific  $C_t$  thresholds were applied consistently between runs, and relative  
311 transcript levels were calculated by transforming the  $C_t$  values using the expression  $2^{-C_t}$ , followed by  
312 normalisation to cDNA quantity.

313

## 314 **Cell lysis and western blotting**

315 Cell pellets were lysed in 0.1% Triton X-100 in PBS containing a Halt Protease Inhibitor  
316 Cocktail (Thermo Fisher Scientific; 78430). Lysates were vortexed and incubated for 15 min on ice,  
317 followed by clarification at 17,000 $\times g$  for ten min at 4°C. Following determination of the protein  
318 concentration in the supernatants (Pierce™ BCA Protein Assay Kit; Thermo Fisher Scientific, 23250),  
319 samples were prepared for denaturing gel electrophoresis by addition of Laemmli Sample Buffer  
320 (BioRad, 161-0747), Sample Reducing Agent (Thermo Fisher Scientific, NP0009) and water to  
321 consistent protein concentrations.

322 Samples were resolved on Mini-Protean® TGX 4–20% gels or TGX 7.5% gels (BioRad  
323 Laboratories, 4568095 and 4568025). Separated proteins were transferred to Trans-Blot Turbo 0.2-  
324  $\mu$ m PVDF membranes (BioRad, 170-4157), using the BioRad Trans-Blot Turbo Transfer System.  
325 Membranes were blocked in 10% non-fat dry milk powder in PBS prior to incubation with primary  
326 antibodies overnight at 4°C in 5% milk, 0.15% Tween-20, PBS. Following washing with 0.15% Tween-  
327 20, PBS, membranes were incubated with secondary antibodies conjugated to HRP enzymes (Dako,  
328 P0447 and P0448) and washed again. Blots were developed with Clarity Western ECL Substrate  
329 (BioRad, 170-5060). Capturing of the chemiluminescent signals was performed with the BioRad  
330 Chemidoc™ MP Imaging System. Signals were quantified with BioRad Image Lab 6.0.1 software. The  
331 primary antibodies are specified in S5 Table.

332

## 333 **Statistical analyses**

334 Graphs and statistical analyses were executed with GraphPad Prism® version 6.01 software.  
335 Data are presented as mean ± standard error of the mean. Student's t test was used to examine  
336 statistical significance and significance levels were set to p<0.05.

337

## 338 Acknowledgements

339 We would like to thank the Research Assistants John Harvey and Miriam Pollard for their work  
340 on the wider project of which this study was a part.

341

## 342 References

- 343 [1] Espay AJ, Brundin P, Lang AE. Precision medicine for disease modification in Parkinson disease.  
344 Nat Rev Neurol. 2017;13:119-126.
- 345 [2] Valente EM, Abou-Sleiman PM, Caputo V, Muqit MMK, Harvey K, Gispert S, et al. Hereditary  
346 early-onset Parkinson's disease caused by mutations in pink1. Science. 2004;304:1158-70.
- 347 [3] Kitada T, Asakawa S, Hattori N, Matsumine H, Yamamura Y, Minoshima S, et al. Mutations in the  
348 parkin gene cause autosomal recessive juvenile parkinsonism. Nature. 1998;392:605-8.
- 349 [4] Yamano K, Youle RJ. PINK1 is degraded through the n-end rule pathway. Autophagy.  
350 2013;9:1758-69.
- 351 [5] Narendra DP, Jin SM, Tanaka A, Suen D, Gautier CA, Shen J, et al. PINK1 is selectively stabilized on  
352 impaired mitochondria to activate parkin. PLoS Biol. 2010;8:e1000298.
- 353 [6] Okatsu K, Oka T, Iguchi M, Imamura K, Kosako H, Tani N, et al. PINK1 autophosphorylation upon  
354 membrane potential dissipation is essential for parkin recruitment to damaged mitochondria.  
355 Nat Commun. 2012;3:1016.
- 356 [7] Kondapalli C, Kazlauskaitė A, Zhang N, Woodroof HI, Campbell DG, Gourlay R, et al. PINK1 is  
357 activated by mitochondrial membrane potential depolarization and stimulates parkin E3 ligase  
358 activity by phosphorylating serine 65. Open Biol. 2012;2:120080.
- 359 [8] Kane LA, Lazarou M, Fogel AI, Li Y, Yamano K, Sarraf SA, et al. PINK1 phosphorylates ubiquitin to  
360 activate parkin E3 ubiquitin ligase activity. J Cell Biol. 2014;205:143-53.
- 361 [9] Koyano F, Okatsu K, Kosako H, Tamura, Go YE, Kimura M, Kimura Y, et al. Ubiquitin is  
362 phosphorylated by PINK1 to activate parkin. Nature. 2014;510:162-6
- 363 [10] Gegg ME, Cooper JM, Chau KY, Rojo M, Schapira AHV, Taanman J-W. Mitofusin 1 and mitofusin  
364 2 are ubiquitinated in a PINK1/parkin-dependent manner upon induction of mitophagy. Hum  
365 Mol Genet. 2010;19:4861-70.

- 366 [11] Nguyen TN, Padman BS, Lazarou M. Deciphering the molecular signals of PINK1/Parkin  
367 mitophagy. *Trends Cell Biol.* 2016;26:733-744.
- 368 [12] Hattori N, Mizuno Y. Twenty years since the discovery of the parkin gene. *J Neural Transm*  
369 (Vienna). 2017;124:1037-1054.
- 370 [13] Huttenlocher J, Stefansson H, Steinberg S, Helgadottir HT, Sveinbjörnsdóttir S, Riess O, et al.  
371 Heterozygote carriers for CNVs in PARK2 are at increased risk of Parkinson's disease. *Hum Mol*  
372 *Genet.* 2015;24:5637-43.
- 373 [14] Puschmann A, Fiesel FC, Caulfield TR, Hudec R, Ando M, Truban D, et al. Heterozygous PINK1  
374 p.G411S increases risk of Parkinson's disease via a dominant-negative mechanism. *Brain.*  
375 2016;140:98-117.
- 376 [15] Gandhi S, Plun-Favreau H. Mutations and mechanism: how PINK1 may contribute to risk of  
377 sporadic Parkinson's disease. *Brain.* 2017;140:2-5.
- 378 [16] Yi W, Macdougall EJ, Tang MY, Krahn AI, Gan-Or Z, Trempe J, et al. The landscape of Parkin  
379 variants reveals pathogenic mechanisms and therapeutic targets in Parkinson's disease. *Hum*  
380 *Mol Genet.* 2019;28:2811-2825.
- 381 [17] Hsieh CH, Shaltouki A, Gonzalez AE, Da Cruz AB, Burbulla LF, St. Lawrence E, et al. Functional  
382 impairment in Miro degradation and mitophagy is a shared feature in familial and sporadic  
383 Parkinson's disease. *Cell Stem Cell.* 2016;19:709-724.
- 384 [18] Wang X. Destructive cellular paths underlying familial and sporadic Parkinson disease converge  
385 on mitophagy. *Autophagy.* 2017;13:1998-1999.
- 386 [19] Ryan BJ, Hoek S, Fon EA, Wade-Martins R. Mitochondrial dysfunction and mitophagy in  
387 Parkinson's: from familial to sporadic disease. *Trends Biochem Sci.* 2015;40:200-10.
- 388 [20] Rakovic A, Grünewald A, Kottwitz J, Brüggemann N, Pramstaller PP, Lohmann K, et al. Mutations  
389 in PINK1 and Parkin impair ubiquitination of mitofusins in human fibroblasts. *PLoS ONE.*  
390 2011;6, e16746.
- 391 [21] Villa E, Proïcs E, Rubio-Patiño C, Obba S, Zunino B, Bossowski JP, et al. Parkin-independent  
392 mitophagy controls chemotherapeutic response in cancer cells. *Cell Rep.* 2017;20:2846-2859.
- 393 [22] Walsh TG, Van Den Bosch MTJ, Lewis KE, Williams CM, Poole AW. Loss of the mitochondrial  
394 kinase PINK1 does not alter platelet function. *Sci Rep.* 2018;8:14377.
- 395 [23] Sunada Y, Saito F, Matsumura K, Shimizu T. Differential expression of the parkin gene in the  
396 human brain and peripheral leukocytes. *Neurosci Lett.* 1998;254:180-2.
- 397 [24] Kasap M, Akpınar G, Sazci A, Idrisoglu HA, Vahaboğlu H. Evidence for the presence of full-length  
398 PARK2 mRNA and Parkin protein in human blood. *Neurosci Lett.* 2009;460:196-200.

- 399 [25] Manzanillo PS, Ayres JS, Watson RO, Collins AC, Souza G, Rae CS, et al. The ubiquitin ligase  
400 parkin mediates resistance to intracellular pathogens. *Nature*. 2013;501:512-6.
- 401 [26] Schneider U, Schwenk HU, Bornkamm G. Characterization of EBV-genome negative 'null' and 'T'  
402 cell lines derived from children with acute lymphoblastic leukemia and leukemic transformed  
403 non-Hodgkin lymphoma. *Int J Cancer*. 1977;19:621-6.
- 404 [27] Gioia L, Siddique A, Head SR, Salomon DR, Su AI. A genome-wide survey of mutations in the  
405 Jurkat cell line. *BMC Genomics*. 2018;19:334.
- 406 [28] Trickett A, Kwan YL. T cell stimulation and expansion using anti-CD3/CD28 beads. *J Immunol*  
407 *Methods*. 2003;275:251-5.
- 408 [29] Grievink H, Tarik WL, Klufft C, Moerland M, Malone KE. Comparison of three isolation techniques  
409 for human peripheral blood mononuclear cells: cell recovery and viability, population  
410 composition, and cell functionality. *Biopreserv Biobank*. 2016;14:410-415.
- 411 [30] Li J, Ma C, Long F, Yang D, Liu X, Hu Y, et al. Parkin impairs antiviral immunity by suppressing the  
412 mitochondrial reactive oxygen species-Nlrp3 axis and antiviral inflammation. *iScience*.  
413 2019;16:468-484.
- 414 [31] Park IH, Lerou PH, Zhao R, Huo H, Daley GQ. Generation of human-induced pluripotent stem  
415 cells. *Nat Protoc*. 2008;3:1180-6.

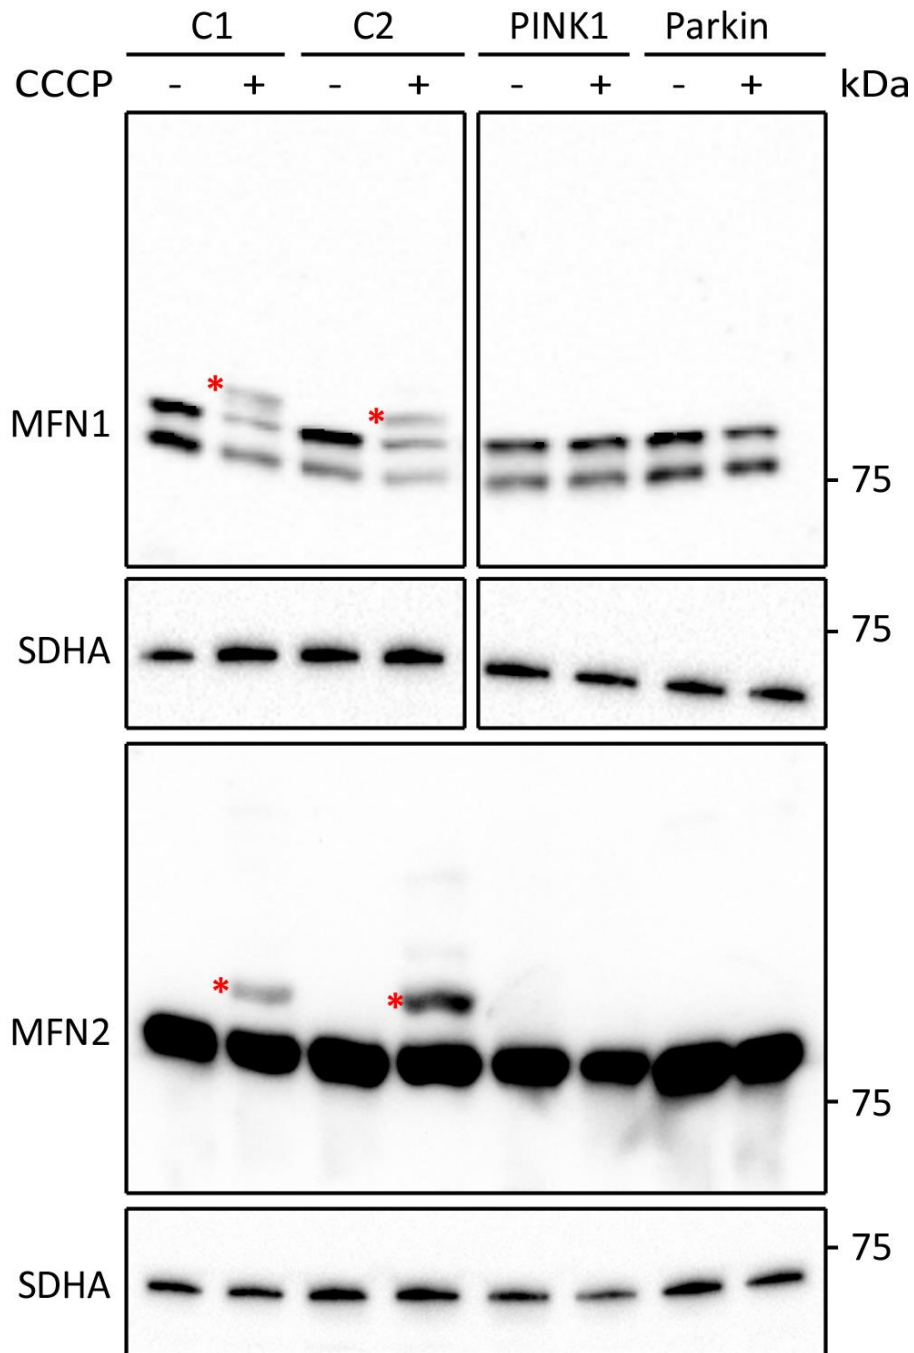

416

417 **Fig 1. Analysis of CCCP-induced MFN ubiquitination in cultured fibroblast cells.** Western blot  
418 analysis of fibroblasts from healthy controls (C1 and C2) and two early-onset PD patients with  
419 mutations in *PINK1* or *PRKN*. Cells were left untreated or were treated for 2 hours with 20  $\mu$ M CCCP.  
420 Blots were developed with antibodies against MFN1 and MFN2. Antibodies against SDHA were used  
421 as loading control. Asterisks indicate bands representing ubiquitinated MFN proteins.

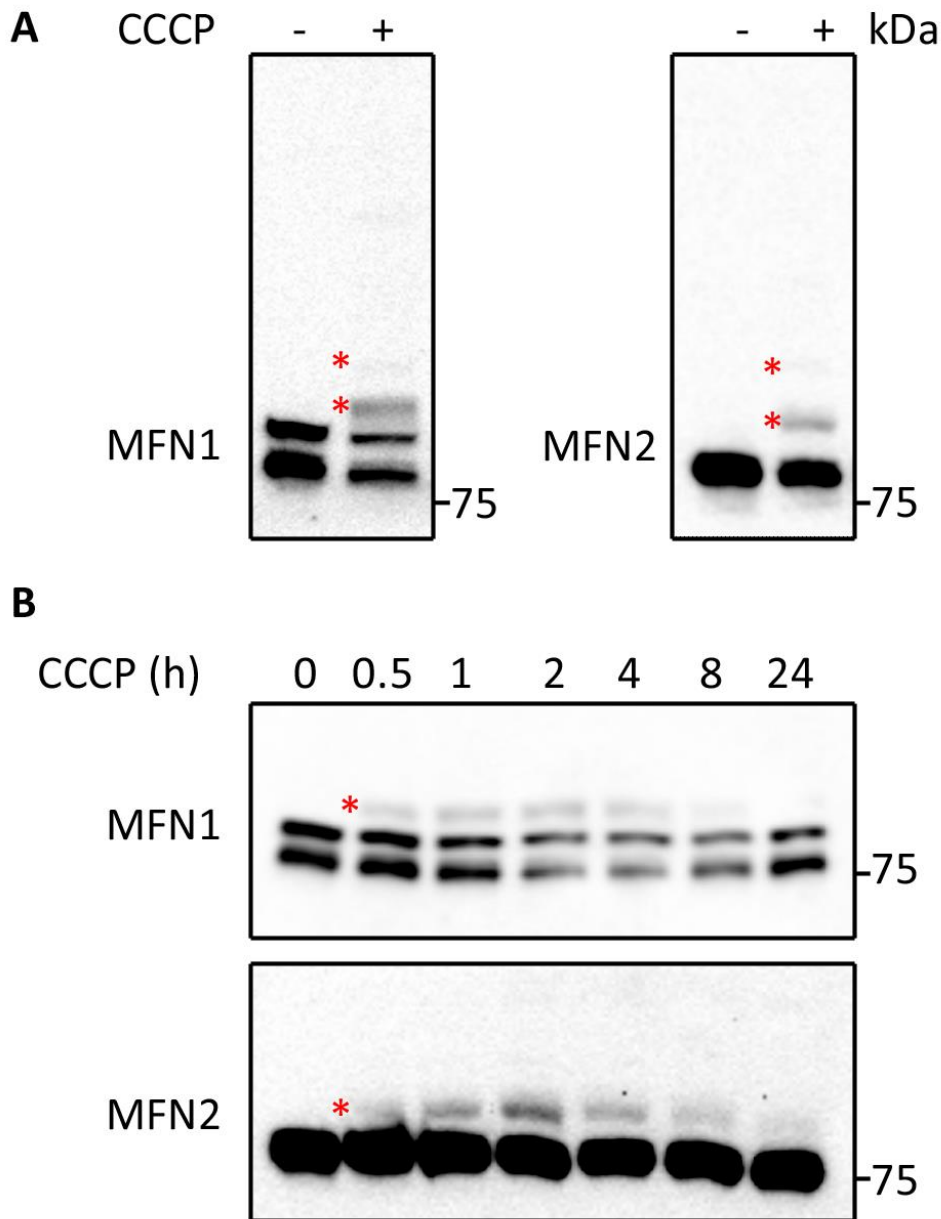

422

423 **Fig 2. Analysis of CCCP-induced MFN ubiquitination in Jurkat cells.** (A) Jurkat cells left untreated or  
424 treated for 2 hours with 20  $\mu$ M CCCP were analysed by western blotting with antibodies against  
425 MFN1 and MFN2. (B) Western blot analysis of Jurkat cells treated with CCCP for increasing periods of  
426 time (0.5–24 hours), developed with antibodies against MFN1 and MFN2. Asterisks indicate bands  
427 representing ubiquitinated MFN proteins.

428

429



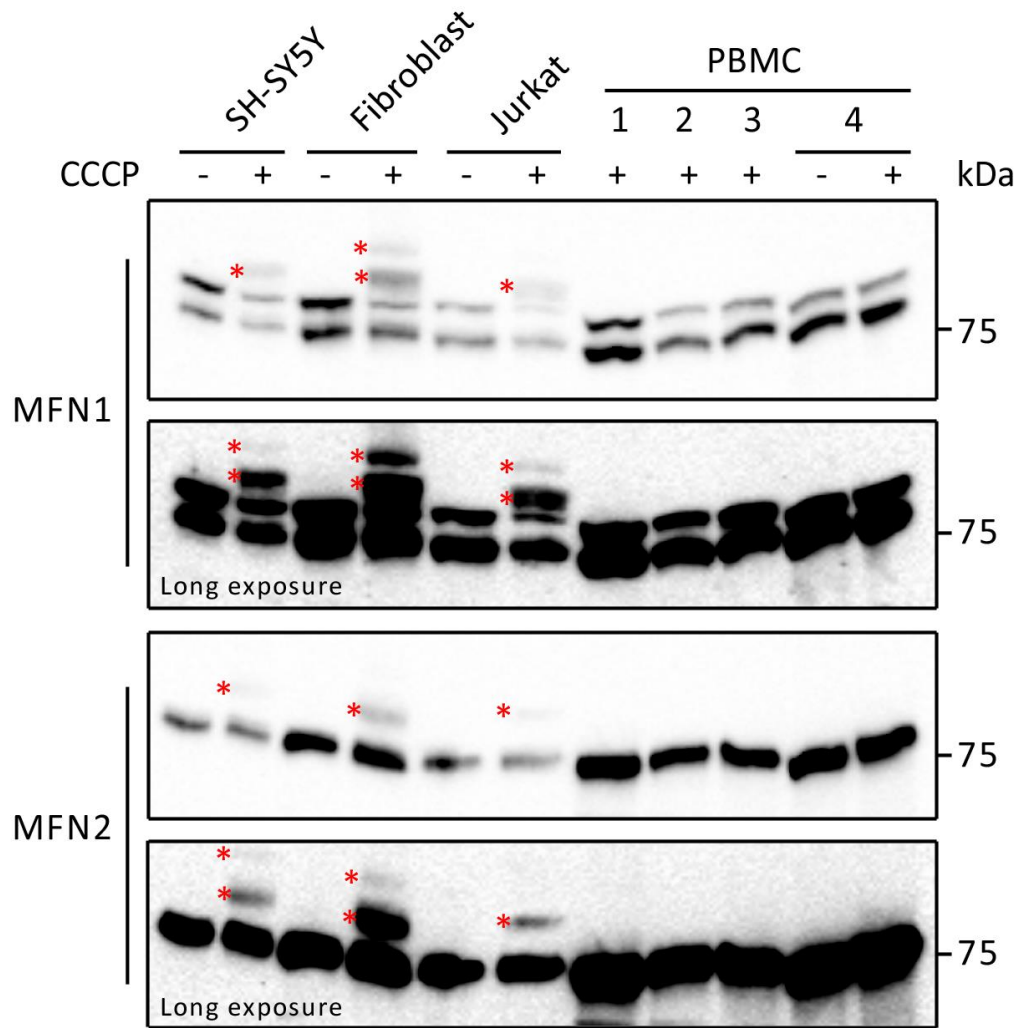

430

431 **Fig 3. Analysis of CCCP-induced MFN ubiquitination in different cells types.** SH-SY5Y, fibroblast,

432 Jurkat and PBMC samples were left untreated or were treated with 20  $\mu$ M CCCP for 2 hours and

433 analysed by western blotting with antibodies against MFN1 and MFN2. Asterisks indicate bands

434 representing ubiquitinated MFN proteins.

435

436

437

438

439

440

441

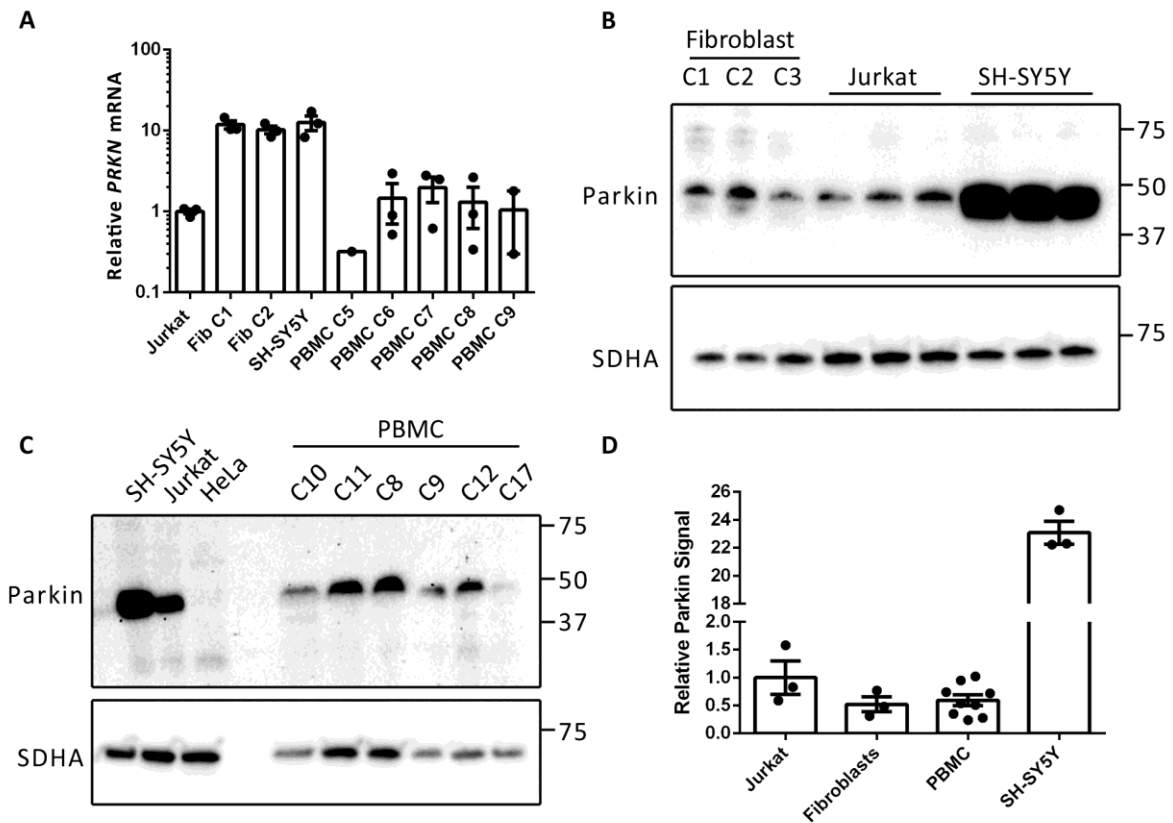

442

443 **Fig 4. Analysis of Parkin expression in different cell types.** (A) Reverse transcriptase qPCR analysis of  
444 *PRKN* mRNA levels in Jurkat, control fibroblast (Fib), SH-SY5Y and PBMC samples. qPCR was  
445 performed on equal amounts of cDNA from each cell type and  $C_t$  values were expressed relative to  
446 the Jurkat sample. (B, C) Western blot analysis of fibroblast, SH-SY5Y, Jurkat and PBMC cultures with  
447 an antibody against Parkin. (D) Quantification of Parkin signal in the different cell types. Signal is  
448 expressed relative to SDHA and normalised to that detected in Jurkat cells. Graphs display mean  $\pm$   
449 SEM.

450

451

452

453

454

455

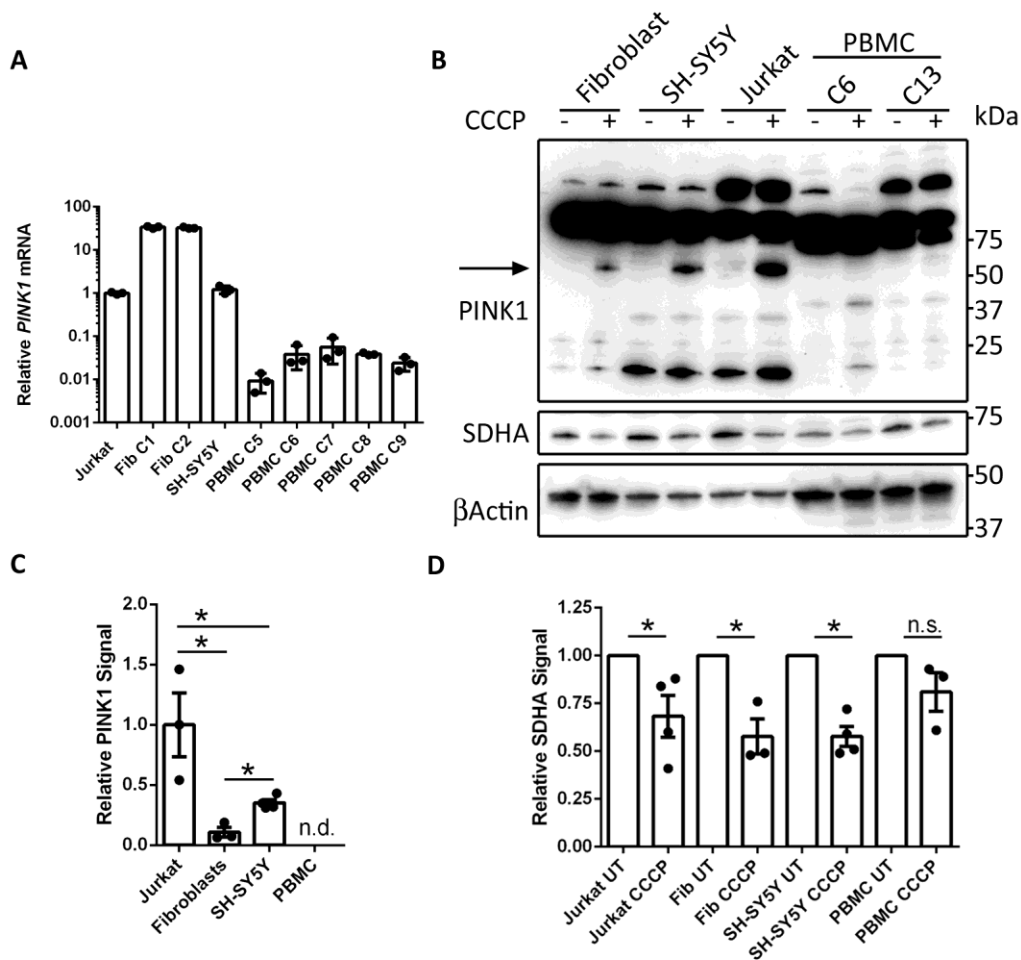

456

457 **Fig 5. Analysis of PINK1 expression in different cell types.** (A) Reverse transcriptase qPCR analysis of

458 *PINK1* mRNA levels in Jurkat, control fibroblast (Fib), SH-SY5Y and PBMC samples. qPCR was

459 performed on equal amounts of cDNA from each cell type and  $C_t$  values were expressed relative to

460 the Jurkat sample. (B) Western blot analysis of fibroblasts, SH-SY5Y, Jurkat and PBMC cultures left

461 untreated and treated with 20  $\mu$ M CCCP for 24 hour with an antibody against PINK1 (Novus

462 Biologicals, BC100-494). The band corresponding to PINK1 is indicated by the arrow. (C)

463 Quantification of PINK1 signal from CCCP-treated cells. Signal is expressed relative to  $\beta$ -actin and

464 normalised to levels detected in Jurkat cells. (D) Quantification of SDHA signal from untreated and

465 24-hour CCCP-treated Jurkat, fibroblast, SH-SY5Y and PBMC samples. Signal is expressed relative to

466  $\beta$ -actin and normalised to the untreated condition. Graphs display mean  $\pm$  SEM; \*= $P$ <0.05, Student's

467 t-test; n.d. = not detected; n.s. = not significant.

468

469

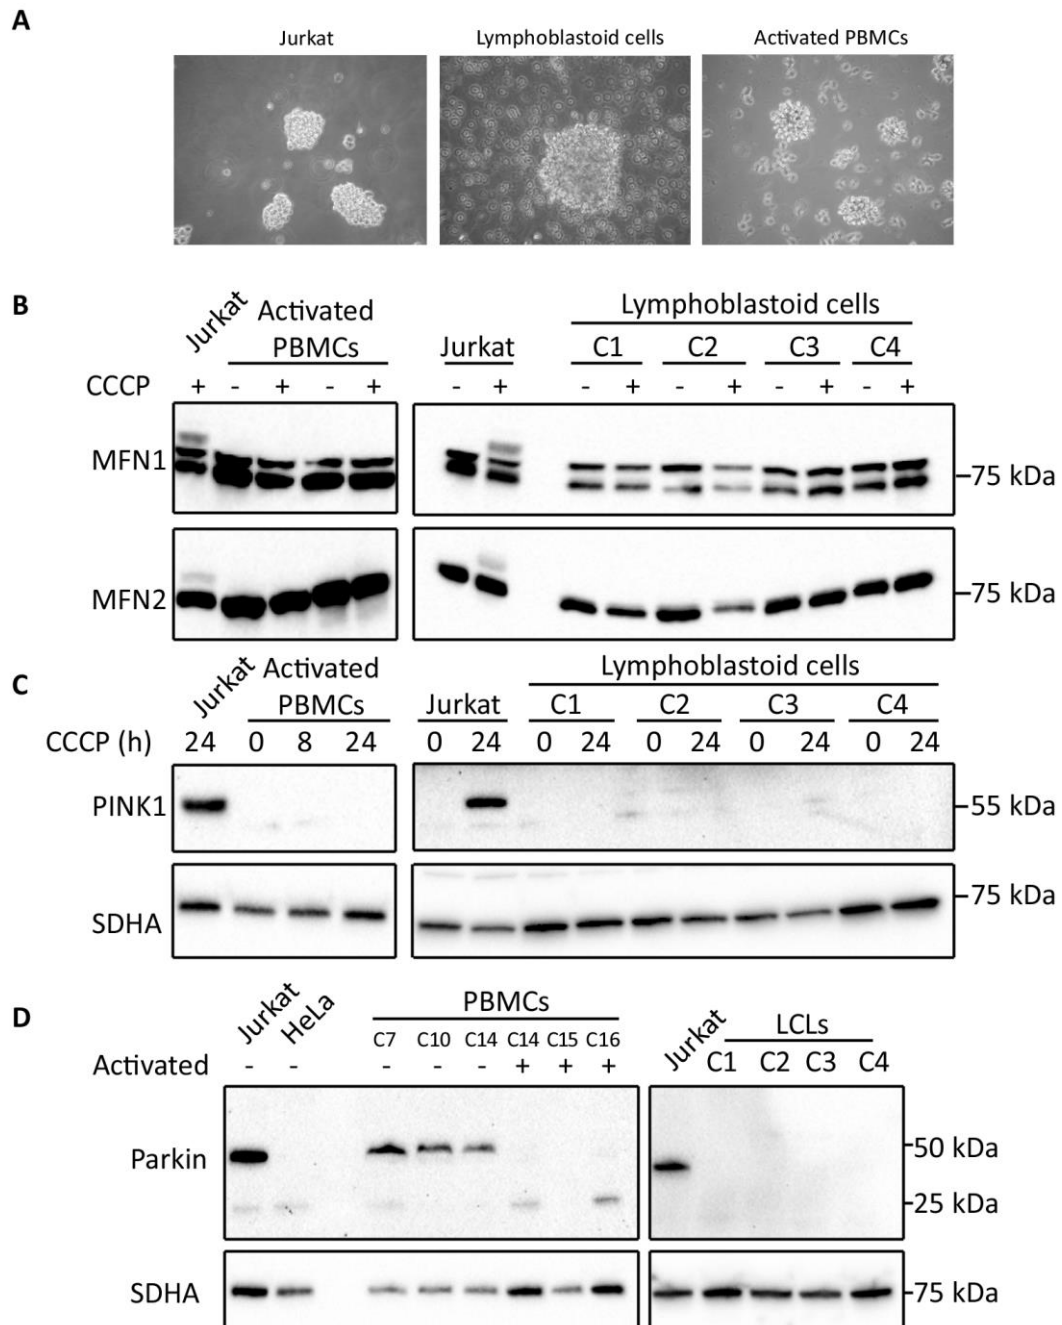

470

471 **Fig 6. Analysis of PINK1 – Parkin signalling pathway in lymphoblastoid cell lines and CD3/CD28**

472 **activated PBMCs.** (A) Phase contrast microscopy images of Jurkat cells, lymphoblastoid cell lines

473 (LCLs) and CD3/CD28 Dynabead activated PBMCs. (B) Western blot analysis of MFN1 and -2

474 ubiquitination following CCCP treatment of activated PBMCs and LCLs. (C) Western blot analysis of

475 PINK1 expression in activated PBMCs and LCLs following prolonged CCCP treatment. (D) Western

476 blot analysis of Parkin expression in resting and CD3/CD28 Dynabead activated PBMCs, and LCLs.

477 **Supporting information**

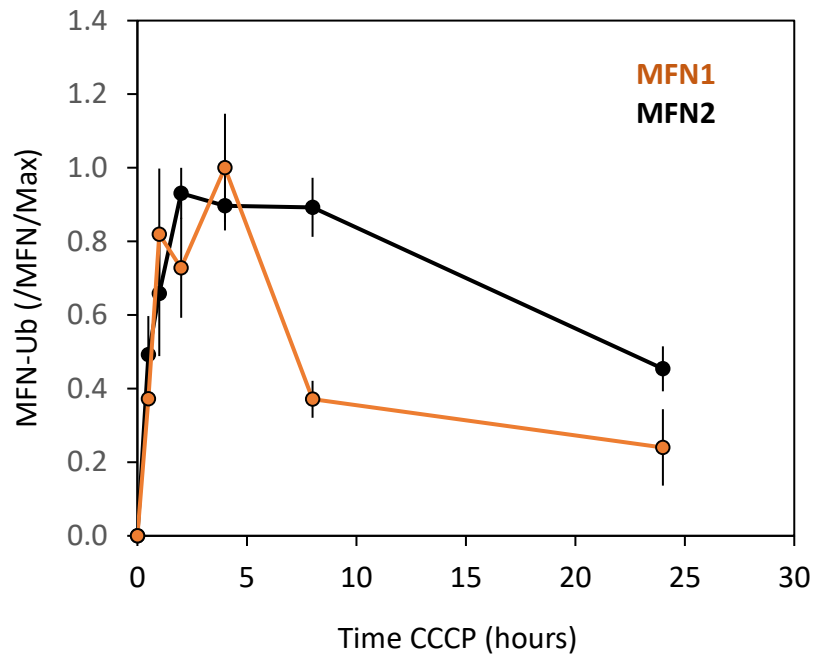

478 **S1 Fig. Time course analysis of MFN ubiquitination in Jurkat cells.** Jurkat cells were treated with 20  
479  $\mu$ M CCCP for increasing periods of time and the ubiquitination of MFN1/MFN2 was analysed by  
480 immunoblotting. The levels of ubiquitinated MFN1 and MFN2 were quantified relative to the  
481 respective non-ubiquitinated protein. Graph represents mean  $\pm$  SEM; MFN1, n=2; MFN2, n=3.

482  
483  
484  
485  
486  
487  
488  
489  
490  
491  
492  
493  
494  
495  
496

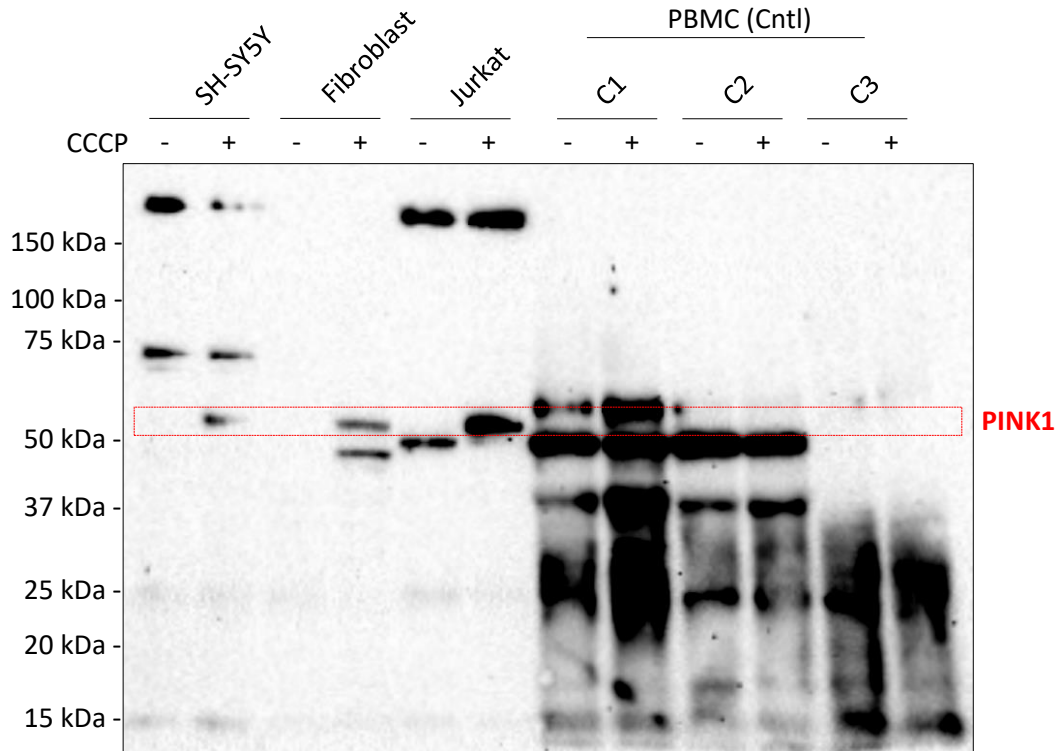

497

498 **S2 Fig. Analysis of PINK1 expression in different cell types.** SH-SY5Y, fibroblast, Jurkat and PBMC  
499 cultures were left untreated or treated with 20  $\mu$ M CCCP for 24 hours. Samples were analysed by  
500 western blotting with the PINK1 antibody clone D8G3 (Cell Signaling Technology). PINK1 protein is  
501 indicated by the red box.

502

503

504

505

506

507

508

509

510

511

512

513

514

515

516

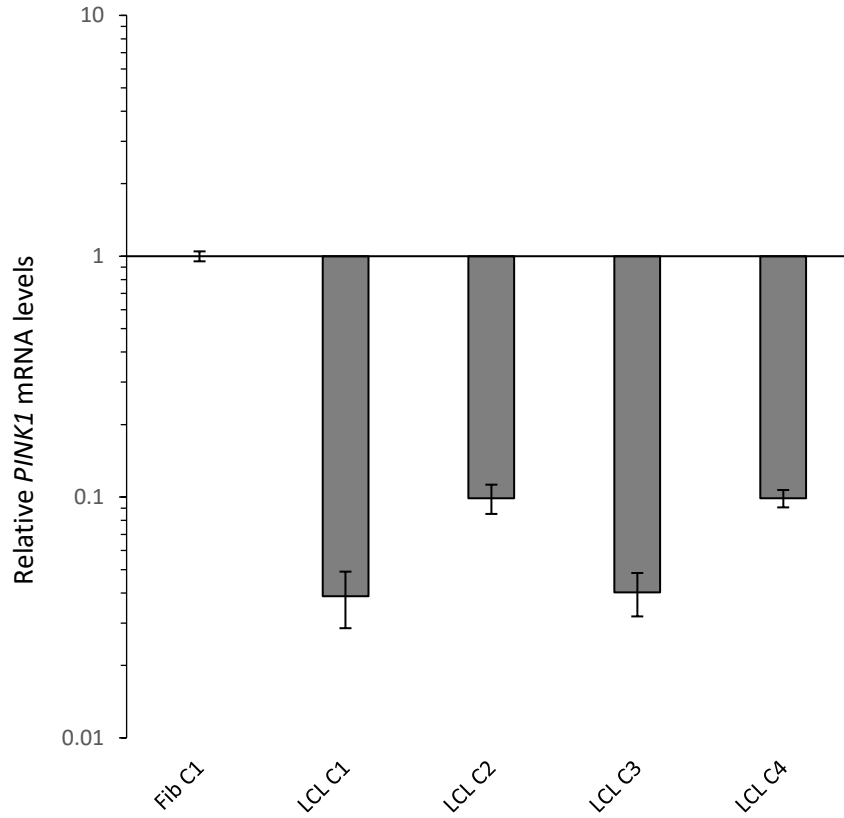

517

518 **S3 Fig. Reverse transcriptase qPCR analysis of *PINK1* in LCLs.** qPCR was performed on equal  
519 amounts of cDNA from each cell sample, and  $C_t$  values were expressed relative to the fibroblast (Fib)  
520 sample.

521

522

523

524

525

526

527

528

529

530

531

532

533

534

535

536 **S4 Table.** Age and sex of PBMC donors.

| <b>PBMC</b> | <b>Age</b> | <b>M/F</b> |
|-------------|------------|------------|
| C1          | 31.2       | F          |
| C2          | 26.4       | M          |
| C3          | 25.3       | M          |
| C4          | 28.6       | M          |
| C5          | 60.1       | M          |
| C6          | 64.2       | M          |
| C7          | 66.9       | M          |
| C8          | 74.2       | F          |
| C9          | 27.7       | M          |
| C10         | 58.8       | F          |
| C11         | 31.4       | F          |
| C12         | 50.4       | M          |
| C13         | 34.1       | F          |
| C14         | 58.8       | F          |
| C15         | 72.8       | M          |
| C16         | 64.6       | M          |

537

538

539

540

541

542

543

544

545

546

547

548

549

550

551

552

553

554

555



556 **S5 Table.** Characteristics of antibodies used in this study.

| Target | Host   | Cat. No. (Supplier)               | Immunogen                                          | Clone           | Dilution |
|--------|--------|-----------------------------------|----------------------------------------------------|-----------------|----------|
| MFN1   | Ms mAB | ab57602 (Abcam)                   | Human Mitofusin 1 aa 1-741.                        | [3C9]           | 1:1000   |
| MFN2   | Ms mAB | ab56889 (Abcam)                   | Human Mitofusin 2 aa 661-757                       | [6A8]           | 1:1000   |
| SDHA   | Ms mAB | ab14715 (Abcam)                   | Full length native protein                         | [2E3GC12FB2AE2] | 1:1000   |
| bActin | Ms mAB | ab3280 (Abcam)                    | Chicken Actin aa 50-70                             | [C4]            | 1:1000   |
| Parkin | Rb mAB | 702785 (Thermo Fisher Scientific) | human Parkin aa 1 465                              | [21H24L9]       | 1:100    |
| Parkin | Ms mAB | 4211 (Cell Signaling Technology)  | human recombinant parkin                           | [Prk8]          | 1:500    |
| PINK1  | Rb pAB | BC100-494 (Novus Biological)      | Human PINK1 protein aa 175-250                     |                 | 1:1000   |
| PINK1  | Rb mAB | 6946 (Cell Signaling Technology)  | residues surrounding aa 140 of human PINK1 protein | [D8G3]          | 1:1000   |

557
